# Supplementary material for: Ultrasensitive Ochratoxin A Detection in Cereal Products Using a Fluorescent Aptasensor Based on RecJf Exonuclease-Assisted Target Recycling
Source: MDPI journal article supplement (doi:10.3390/foods13040595), 2024-02-16
Supplement: s1 [file s1]

## **Supplementary Material**

### **Ultrasensitive Ochratoxin A Detection in Cereal Products Using a Fluorescent Aptasensor Based on RecJ<sub>f</sub> Exonuclease-Assisted Target Recycling**

#### **This file includes:**

Figure S1. SEM images of SMBs, Apt-SMBs and FAM-cDNA-Apt-SMBs.

Figure S2. Zeta potential analyses of SMBs, Apt-SMBs and FAM-cDNA-Apt-SMBs.

Figure S3. Electrophoretic characterization and circular dichroism for feasibility verification.

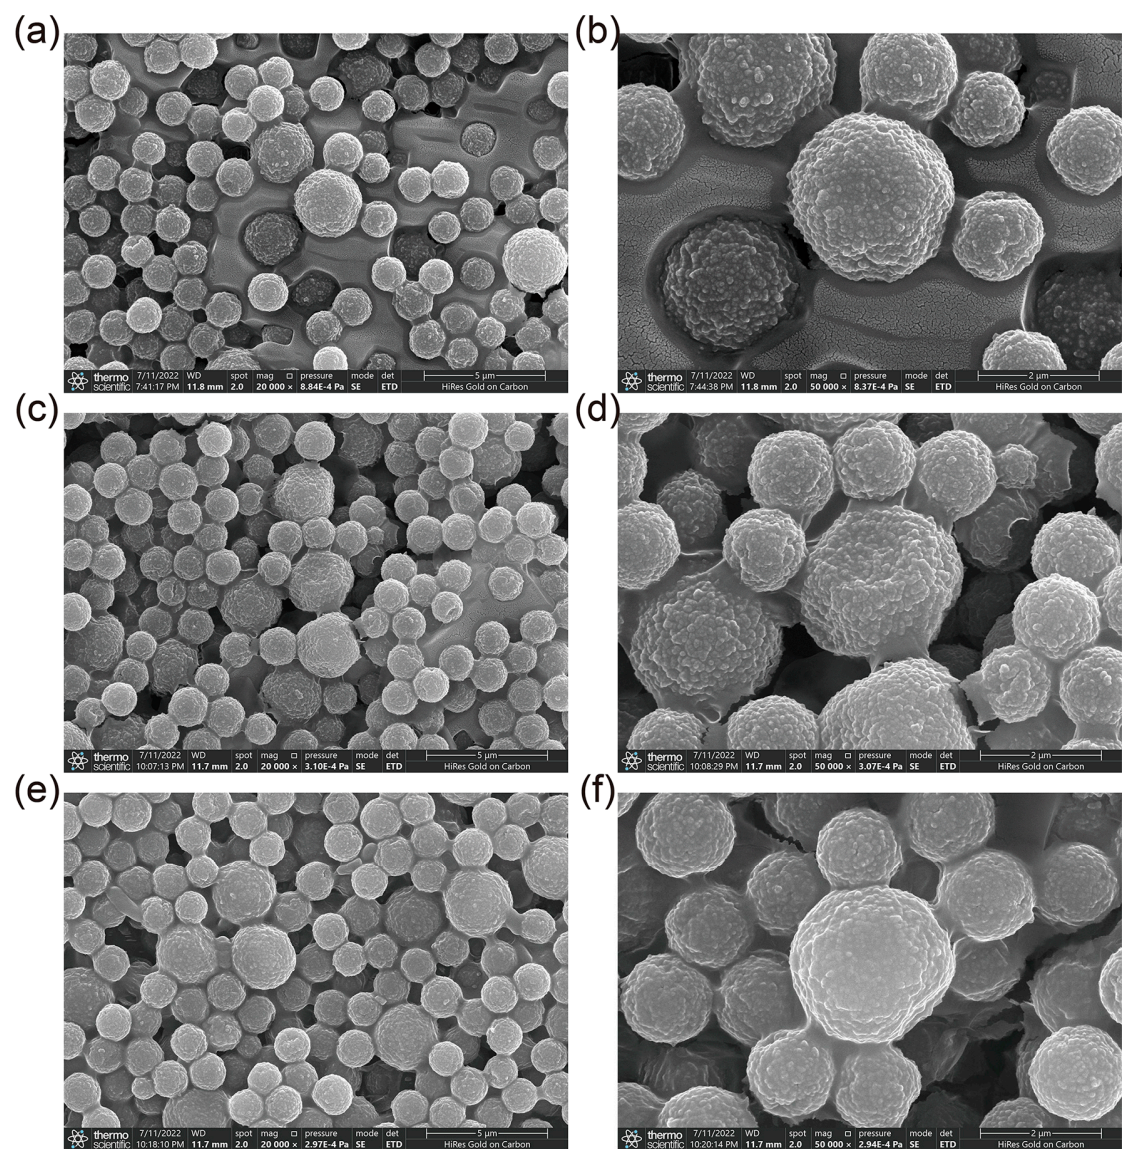

Figure S1. SEM images of SMBs (a, b), Apt-SMBs (c, d) and FAM-cDNA-Apt-SMBs (e, f). Scale bar: 5  $\mu\text{m}$  (a, c, e) and 2  $\mu\text{m}$  (b, d, f).

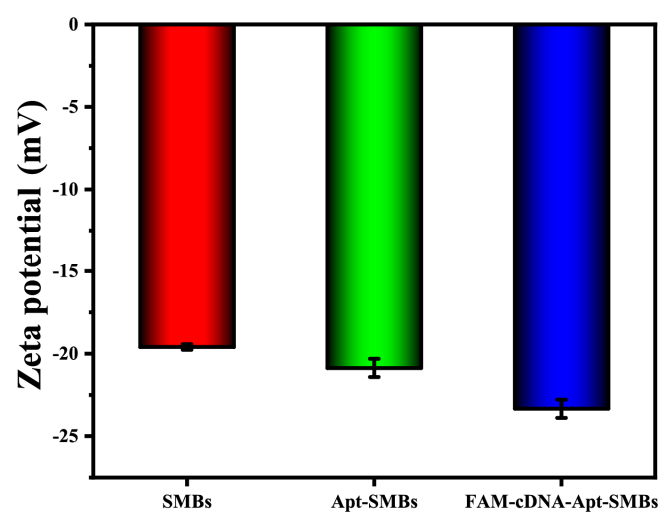

Figure S2. Zeta potential analyses of SMBs, Apt-SMBs and FAM-cDNA-Apt-SMBs.

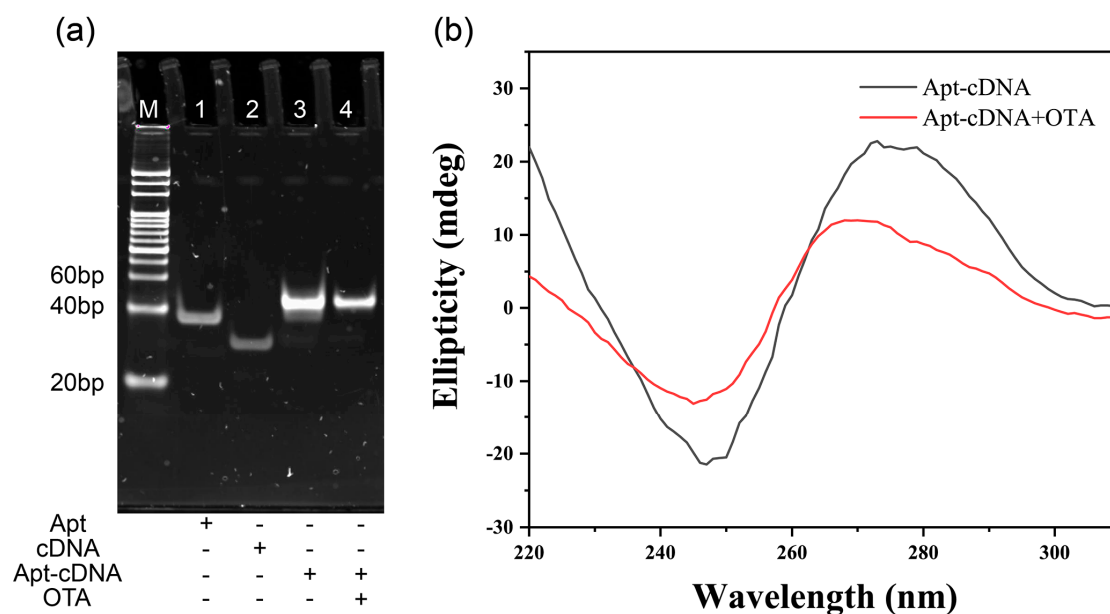

Figure S3. Electrophoretic characterization and circular dichroism analysis for feasibility verification. **(a)** The result of a native polyacrylamide gel electrophoresis (PAGE) assay (12%). Lane 1: Apt (1  $\mu$ M); Lane 2: cDNA (1  $\mu$ M); Lane 3: Apt-cDNA (1  $\mu$ M); Lane 4: Apt-cDNA (1  $\mu$ M) + OTA (1  $\mu$ g/mL). The OTA aptamer/cDNA duplex were formed by hybridization at room temperature for 30 min (lane 3), while OTA were reacted with aptamer/cDNA duplex at 37  $^{\circ}$ C for 2 h (lane 4). **(b)** The circular dichroism analysis of aptamer/cDNA duplex (1  $\mu$ M) and aptamer/cDNA duplex (1  $\mu$ M) treated with OTA (1  $\mu$ g/mL).
